# Supplementary material for: Improving polygenic risk prediction from summary statistics by an empirical Bayes approach
Source: PubMed Central journal article supplement (PMC5286518; doi:10.1038/srep41262), 2017-02-01
Supplement: srep41262-s1.pdf [file srep41262-s1.pdf]

## Supplementary Information

### Improving polygenic risk prediction from summary statistics by an empirical Bayes approach

Hon-Cheong So and Pak C. Sham

Supplementary Table 1 Predictive performances (in  $R^2$  for linear traits and AUC for binary traits) *at the optimal  $p$ -value threshold* for standard PRS and three other weighting schemes in simulations, for  $N = 15000$  and  $20000$

| $N$   | $h^2$ | Linear traits |       |         |             | Binary traits |       |         |             |
|-------|-------|---------------|-------|---------|-------------|---------------|-------|---------|-------------|
|       |       | Standard      | Tdr   | Tweedie | Tweedie*tdr | Standard      | Tdr   | Tweedie | Tweedie*Tdr |
| 15000 | 0.15  | 0.104         | 0.108 | 0.104   | 0.102       | 0.591         | 0.599 | 0.598   | 0.591       |
|       | 0.35  | 0.303         | 0.306 | 0.294   | 0.293       | 0.708         | 0.714 | 0.714   | 0.710       |
|       | 0.55  | 0.500         | 0.504 | 0.491   | 0.490       | 0.793         | 0.799 | 0.799   | 0.797       |
| 20000 | 0.15  | 0.112         | 0.114 | 0.110   | 0.110       | 0.607         | 0.613 | 0.612   | 0.609       |
|       | 0.35  | 0.312         | 0.312 | 0.304   | 0.302       | 0.723         | 0.728 | 0.728   | 0.726       |
|       | 0.55  | 0.514         | 0.516 | 0.500   | 0.498       | 0.811         | 0.814 | 0.814   | 0.814       |

We first applied LD-clumping with an  $r^2$  threshold of 0.25 to all SNPs, followed by  $p$ -value thresholding in the testing set. The results were derived from testing over a range of  $p$ -value thresholds and picking the threshold that gave the best predictive performance.

$N$  denotes the total sample size. For binary traits, an equal number of cases and controls are simulated. Tdr: True discovery rate;  $h^2$ : total heritability explained.

Supplementary Table 2 Predictive performances (in  $R^2$  for linear traits and AUC for binary traits) when *all* markers are included in PRS in simulations for  $N = 15000$  and  $20000$

| $N$   | $h^2$ | Linear traits |       |         |             |                   | Binary traits |       |         |             |                   |
|-------|-------|---------------|-------|---------|-------------|-------------------|---------------|-------|---------|-------------|-------------------|
|       |       | Standard      | Tdr   | Tweedie | Tweedie*tdr | Standard best $p$ | Standard      | Tdr   | Tweedie | Tweedie*tdr | Standard best $p$ |
| 15000 | 0.150 | 0.025         | 0.106 | 0.096   | 0.102       | 0.104             | 0.545         | 0.599 | 0.586   | 0.591       | 0.591             |
|       | 0.350 | 0.112         | 0.301 | 0.284   | 0.293       | 0.303             | 0.601         | 0.714 | 0.703   | 0.710       | 0.708             |
|       | 0.550 | 0.235         | 0.487 | 0.483   | 0.490       | 0.500             | 0.656         | 0.799 | 0.792   | 0.797       | 0.793             |
| 20000 | 0.150 | 0.032         | 0.114 | 0.104   | 0.110       | 0.112             | 0.552         | 0.613 | 0.602   | 0.609       | 0.607             |
|       | 0.350 | 0.133         | 0.306 | 0.298   | 0.302       | 0.312             | 0.616         | 0.727 | 0.720   | 0.726       | 0.723             |
|       | 0.550 | 0.274         | 0.497 | 0.494   | 0.498       | 0.514             | 0.673         | 0.813 | 0.806   | 0.814       | 0.811             |

For the columns labelled “Standard”, “Tdr”, “Tweedie” and “Tweedie\*tdr”, we first applied LD-clumping with an  $r^2$  threshold of 0.25 to all SNPs, then PRS was derived using *all* SNPs that remained. There was *no* selection of  $p$ -value thresholds.

The best predictive performance obtained from optimal  $p$ -value thresholds using standard PRS are also shown for comparison (under the column “standard best  $p$ ”).  $N$  denotes the total sample size. For binary traits, an equal number of cases and controls are simulated. Tdr: True discovery rate;  $h^2$ : total heritability explained.

Supplementary Table 3 Details of simulation scenarios with a mixture of small and larger effects

| Scenario | Fraction of causal variants (%) | Total heritability explained (%) | No. of variants simulated under $V_g \sim \text{uniform}(0.4\%, 0.8\%)$ |
|----------|---------------------------------|----------------------------------|-------------------------------------------------------------------------|
| 1        | 0.10                            | 10                               | 5                                                                       |
| 2        | 0.10                            | 20                               | 5                                                                       |
| 3        | 0.10                            | 30                               | 5                                                                       |
| 4        | 0.10                            | 40                               | 5                                                                       |
| 5        | 0.25                            | 10                               | 10                                                                      |
| 6        | 0.25                            | 20                               | 10                                                                      |
| 7        | 0.25                            | 30                               | 10                                                                      |
| 8        | 0.25                            | 40                               | 10                                                                      |
| 9        | 1.00                            | 10                               | 15                                                                      |
| 10       | 1.00                            | 20                               | 15                                                                      |
| 11       | 1.00                            | 30                               | 15                                                                      |
| 12       | 1.00                            | 40                               | 15                                                                      |
| 13       | 2.50                            | 10                               | 20                                                                      |
| 14       | 2.50                            | 20                               | 20                                                                      |
| 15       | 2.50                            | 30                               | 20                                                                      |
| 16       | 2.50                            | 40                               | 20                                                                      |

Please refer to the main text for details. We simulated two sets of casual variants and then combined them. The first set of casual variants were simulated from a double exponential distribution and then scaled. For the second set of variants, their variance explained ( $V_g$ ) was assumed to follow a uniform distribution in the interval [0.4%, 0.8%].

Supplementary Table 4 Predictive performances (prediction  $R^2$  in %) of the standard PRS and four other PRS schemes in simulations using real genotype data under an infinitesimal model

| $h^2$ | Type     | Standard | Tdr   | Tweedie      | Tweedie*tdr  | LDpred       |
|-------|----------|----------|-------|--------------|--------------|--------------|
| 10%   | max      | 0.123    | 0.090 | <b>0.190</b> | 0.154        | 0.172        |
|       | all SNPs | 0.045    | 0.071 | 0.050        | <b>0.099</b> | 0.087        |
| 20%   | max      | 0.243    | 0.092 | 0.130        | 0.101        | <b>0.407</b> |
|       | all SNPs | 0.239    | 0.030 | 0.109        | 0.078        | <b>0.407</b> |
| 30%   | max      | 0.687    | 0.287 | 0.435        | 0.095        | <b>0.935</b> |
|       | all SNPs | 0.686    | 0.287 | 0.410        | 0.078        | <b>0.923</b> |
| 40%   | max      | 1.230    | 0.750 | 0.931        | 0.297        | <b>1.794</b> |
|       | all SNPs | 1.223    | 0.750 | 0.931        | 0.297        | <b>1.683</b> |

We simulated an infinitesimal model in which all markers were causal and their effects followed a normal distribution of zero mean. The best performing PRS weighting method in each scenario is in bold. % causal: percentage of causal markers;  $h^2$ : total heritability explained by panel markers. For all methods except LDpred, we first applied LD-clumping with an  $r^2$  threshold of 0.25 to all SNPs.

“Max” refers to the maximum prediction  $R^2$  achieved after optimizing over a range of  $p$ -value thresholds or fractions of causal variants. “All.SNPs” refers to the predictive performance using all SNPs after LD-clumping, except for LDpred where no clumping was performed. All predictive performances were measured by  $R^2$  in %.

Supplementary Table 5 Predictive performances (prediction  $R^2$  in %) of the standard PRS and four other PRS schemes in simulations using real genotype data under a model of large-effect variants only

| No. of large-effect variants | Total $h^2$ explained | Type     | Standard | Tdr          | Tweedie | Tweedie*tdr  | LDpred       |
|------------------------------|-----------------------|----------|----------|--------------|---------|--------------|--------------|
| 5                            | 3%                    | max      | 1.913    | 2.286        | 2.262   | 2.276        | <b>2.406</b> |
|                              |                       | all SNPs | 0.120    | 1.796        | 0.645   | <b>2.265</b> | 0.100        |
| 10                           | 6%                    | max      | 2.830    | <b>3.024</b> | 2.938   | 2.941        | 2.295        |
|                              |                       | all SNPs | 0.065    | 1.946        | 0.393   | <b>2.896</b> | 0.023        |
| 15                           | 9%                    | max      | 4.976    | 5.209        | 4.658   | 4.850        | <b>5.292</b> |
|                              |                       | all SNPs | 0.172    | 3.418        | 1.581   | <b>4.830</b> | 0.115        |
| 20                           | 12%                   | max      | 8.456    | 8.655        | 8.430   | 8.452        | <b>9.306</b> |
|                              |                       | all SNPs | 0.053    | 3.828        | 1.567   | <b>8.119</b> | 0.254        |

We simulated a model in which there was a limited number of large-effect variants each with heritability explained of 0.6%. All other markers were null. The best performing PRS weighting method in each scenario is in bold. % causal: percentage of causal markers;  $h^2$ : total heritability explained by panel markers. For all methods except LDpred, we first applied LD-clumping with an  $r^2$  threshold of 0.25 to all SNPs.

“Max” refers to the maximum prediction  $R^2$  achieved after optimizing over a range of  $p$ -value thresholds or fractions of causal variants. “All.SNPs” refers to the predictive performance using all SNPs after LD-clumping, except for LDpred where no clumping was performed. All predictive performances were measured by  $R^2$  in %.
